# Supplementary material
Source: PubMed Central journal article supplement (PMC3160481)
Supplement: NIHMS36010-supplement-2.pdf [file NIHMS36010-supplement-2.pdf]

## Supplementary Figure 2

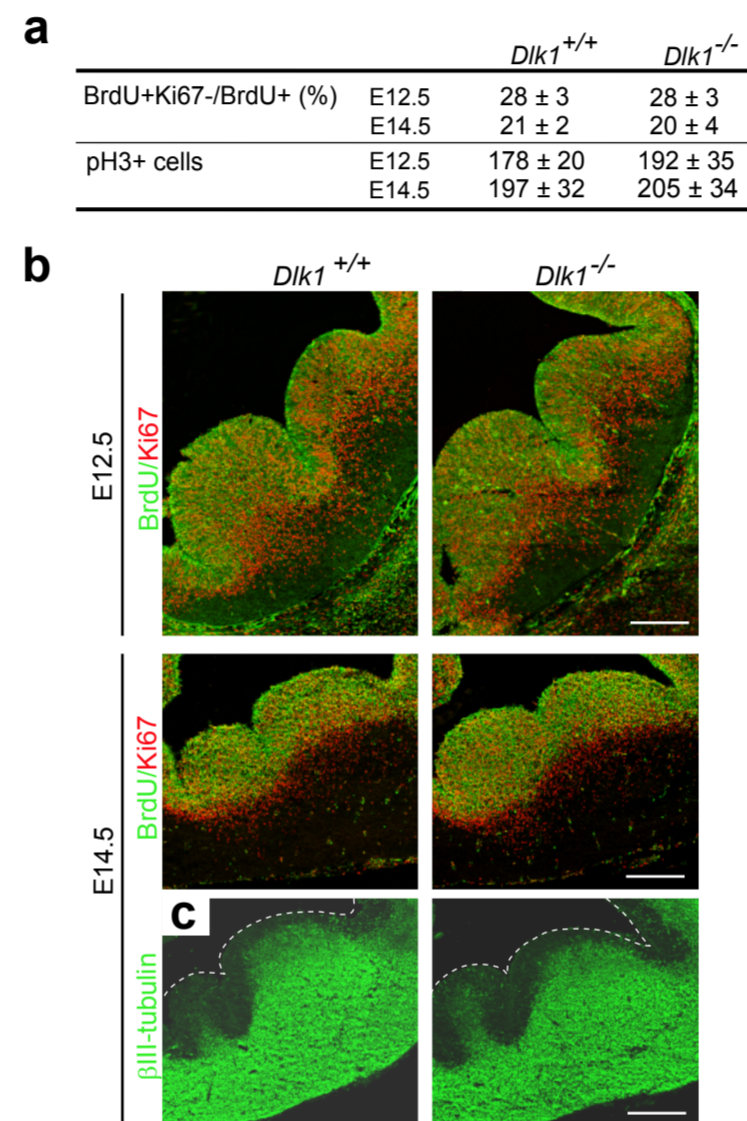

**Supplementary Figure 2. Embryonic neurogenesis is not compromised in *Dik1* mutant mice.** (a) Quantification of the number of Ki67<sup>-</sup>/BrdU<sup>+</sup> cells vs. the total number of BrdU<sup>+</sup> cells in the ventral forebrain of E12.5 and E14.5 WT and *Dik1*<sup>-/-</sup> embryos. Proliferation rate of progenitor cells is shown as the number of cells expressing phosphorylated Histone 3 (pH3+) in the ventral forebrain. No changes were observed between genotypes. (b) Immunohistochemistry for Ki67 (red) and BrdU (green) cells in WT and *Dik1*<sup>-/-</sup> embryonic forebrain at E12.5 and E14.5 stages. No changes were observed between genotypes. (c) Immunohistochemistry for the neuronal marker  $\beta$ III-tubulin in WT and *Dik1*<sup>-/-</sup> embryonic forebrain at E14.5. DAPI (blue) was used for counterstaining. Error bars, s.e.m of 4-6 embryos *per* genotype. Scale bars: in b,c 200  $\mu$ m. Insets on c, 20  $\mu$ m.
