# Supplementary material
Source: PubMed Central journal article supplement (PMC3160481)
Supplement: NIHMS36010-supplement-3.pdf [file NIHMS36010-supplement-3.pdf]

# Supplementary Figure 3

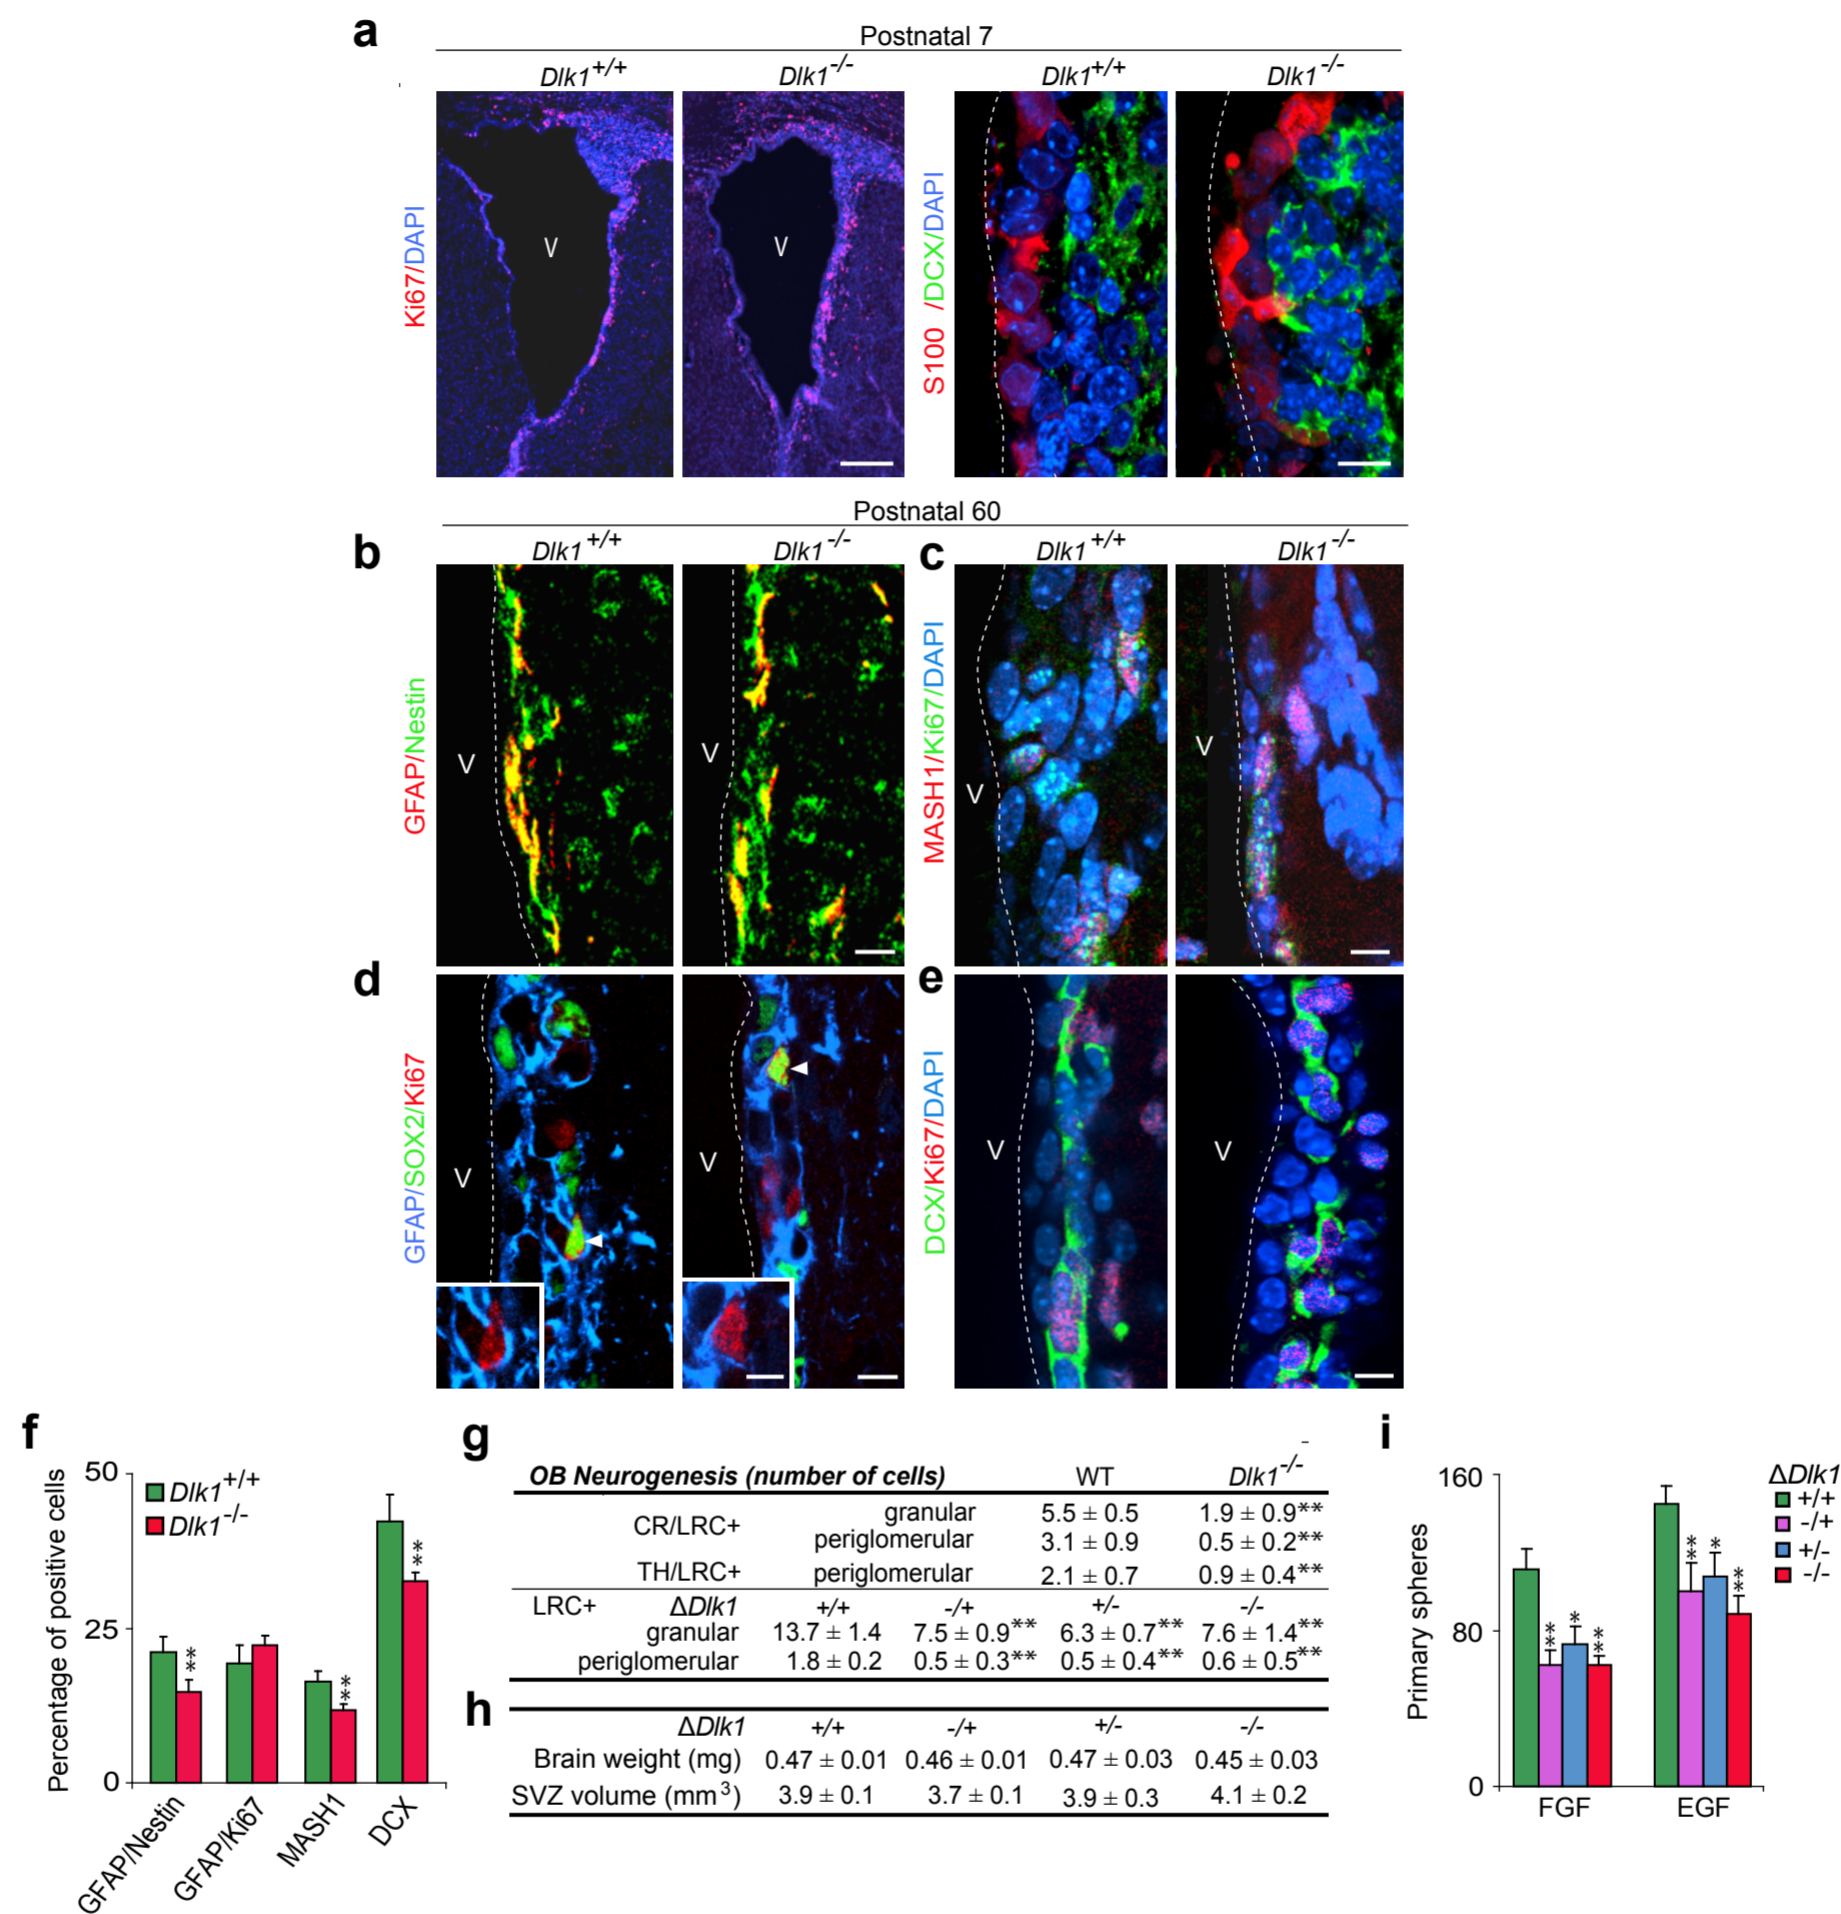

**Supplementary Figure 3. An increase in postnatal stem cell cycling parameters gives rise to exhaustion of the stem cell pool in the adult. (a)** Immunohistochemistry for Ki67 (red) or DCX (green) on coronal sections of SVZ from wild-type and *Dlk1*<sup>-/-</sup> mice at postnatal age 7 (left panel). Immunohistochemistry for DCX (green) and S100? (red) at the same stage (right panel). **(b)** Immunohistochemistry for GFAP (red) and Nestin (green) within the adult SVZ of wild-type and *Dlk1*<sup>-/-</sup> mice. **(c)** Immunohistochemistry for transit amplifying progenitors (TAP), showing MASH1 (red) and Ki67 (green). **(d)** Immunohistochemistry for GFAP (blue), SOX2 (green) and Ki67 (red) within the adult SVZ of wild-type and *Dlk1*<sup>-/-</sup> mice. Insets show high magnification images. **(e)** Immunohistochemistry for DCX (green) and Ki67 (red) in the adult SVZ of wild-type and *Dlk1*<sup>-/-</sup> mice. DAPI (blue) was used for counterstaining. **(f)** Percentage of different cell types within the adult SVZ of wild-type and *Dlk1*<sup>-/-</sup> mice. **(g)** Table showing the number of LRC/TH+ or LRC/CR+ neurons in *Dlk1* mutant OB. **(h)** Table showing brain weight (mg) and SVZ volume (mm<sup>3</sup>) in *Dlk1*<sup>+/+</sup>, *Dlk1*<sup>-/+</sup>, *Dlk1*<sup>+/-</sup> and *Dlk1*<sup>-/-</sup> adult mice. No changes in brain size were observed. **(i)** Primary spheres formed from SVZs of different *Dlk1* mutant mice in the presence of EGF or FGF. \*p<0.05, \*\*p<0.01. Error bars, s.e.m of of at least four mice per genotype. Scale bars: in a 200 μm (right panel in a, 20 μm); in b, 20 μm; in c-e, 20 μm.
