# Supplementary material
Source: PubMed Central journal article supplement (PMC3160481)
Supplement: NIHMS36010-supplement-5.pdf [file NIHMS36010-supplement-5.pdf]

## Supplementary Figure 5

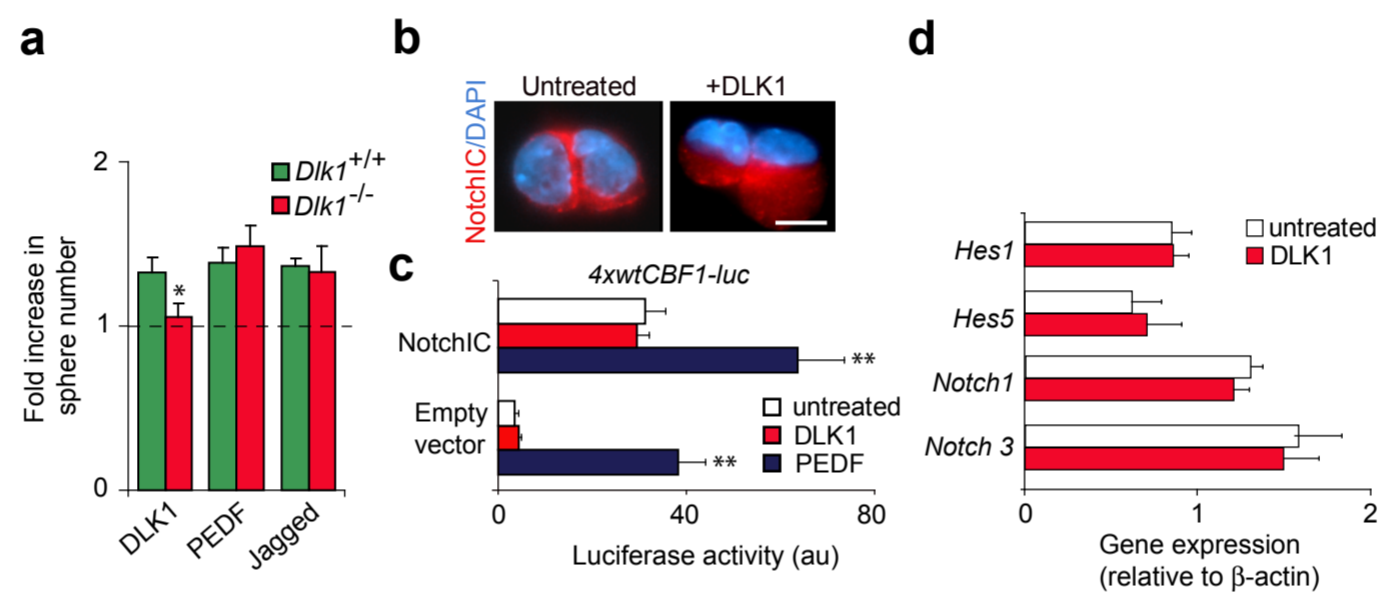

**Supplementary Figure 5. DLK1 induces self-renewal independently of Notch activation (a)** Fold increase in primary neurosphere number in wild-type or *Dlk1*<sup>-/-</sup> NSCs cultures treated with DLK1 (50 ng/ml), PEDF (40 ng/ml) or Jagged1 (1  $\mu$ g/ml) relative to untreated wild-type NSCs (indicated with a dashed line). **(b)** Immunocytochemistry for Notch intracellular domain (NICD) in NSCs after DLK1 treatment. DLK1 does not modify NICD localization in NSCs. **(c)** Activity quantification of an artificial CBF1-dependent reporter that contains consensus CBF1 sequences (4xwtCBF1-luc), directly targeted by NICD, in the absence or presence of DLK1. PEDF was used as a control of activation. The effects of PEDF or DLK1 on CBF1-mediated transcription after Notch signaling (NotchIC overexpression) are shown. No changes in luciferase activity were observed after DLK1 treatment. **(d)** Quantitative PCR of primary neurospheres untreated or treated with DLK1 for 48h. No differences in expression of *Notch1* and *Notch3* or their targets *Hes1* and *Hes5* were observed. \* $p < 0.05$ , \*\* $p < 0.01$ . Error bars, s.e.m of three independent experiments with three cultures per genotype. Scale bars: in b, 10  $\mu$ m.
