# Supplementary material
Source: PubMed Central journal article supplement (PMC3160481)
Supplement: NIHMS36010-supplement-6.pdf [file NIHMS36010-supplement-6.pdf]

## Supplementary Figure 6

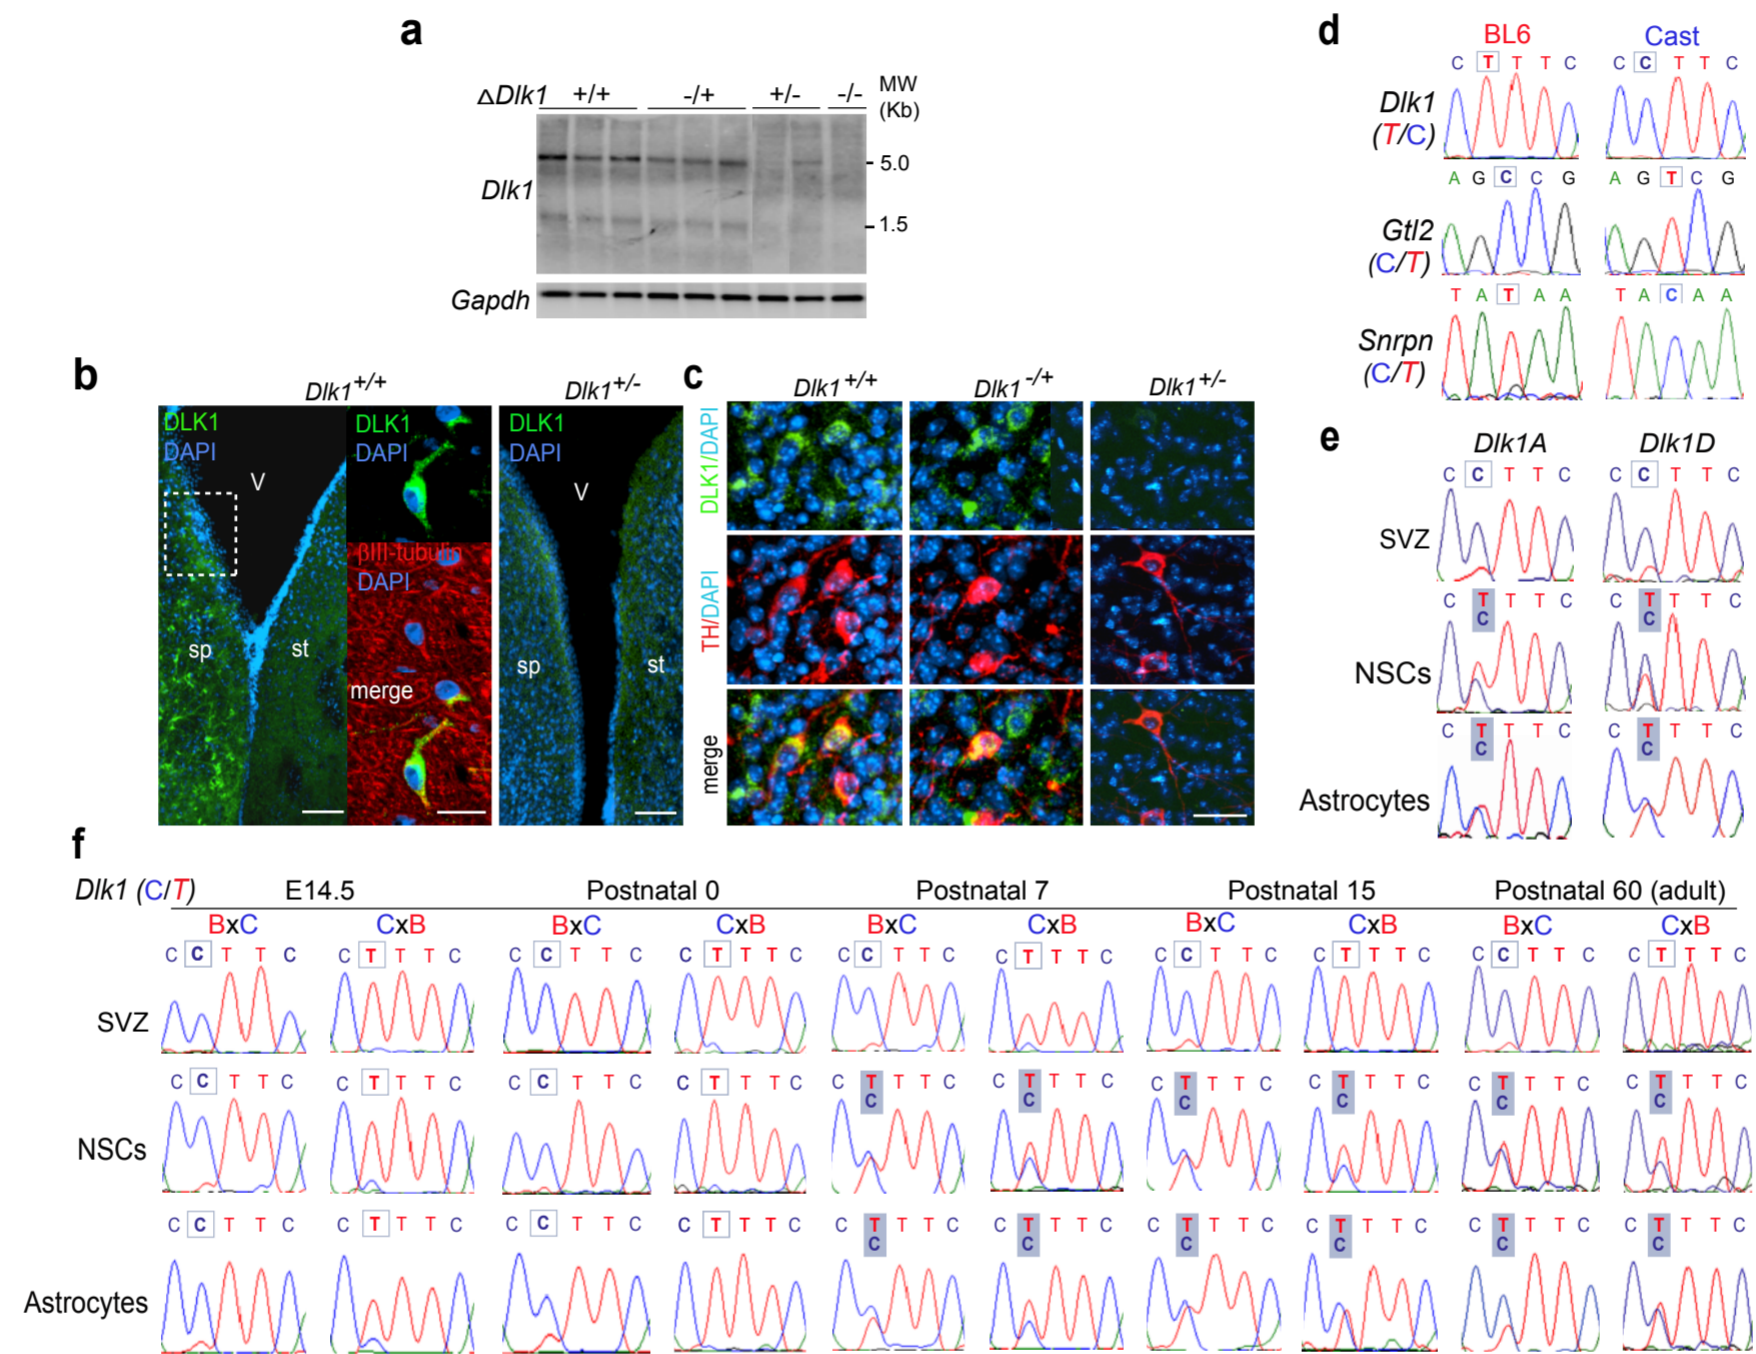

**Supplementary Figure 6. NSCs and niche astrocytes show selective absence of *Dlk1* imprinting postnatally.** (a) Northern-blot from whole brain samples derived from *Dlk1*<sup>+/+</sup>, *Dlk1*<sup>-/+</sup>, *Dlk1*<sup>+/-</sup> and *Dlk1*<sup>-/-</sup> mice. *Dlk1* imprinting is predominant in adult brain. (b) Immunohistochemistry for DLK1 (green) in *Dlk1*<sup>+/+</sup> and *Dlk1*<sup>+/-</sup> mice showing imprinting in  $\beta$ III-tubulin+ neurons (red) of the septum (sp) and ventral striatum (Vst). V, lateral ventricle. (c) Immunohistochemistry for DLK1 (green) in tyrosine hydroxylase (TH, red)-positive neurons of the ventral midbrain of *Dlk1*<sup>+/+</sup>, *Dlk1*<sup>-/+</sup> and *Dlk1*<sup>+/-</sup> mice. *Dlk1* imprinting in these two non-neurogenic zones is observed. DAPI (blue) was used for counterstaining. (d) Genomic DNA sequence traces showing diagnostic strain-specific polymorphism for detection of *Dlk1* (T/C), *Gtl2* (C/T) and *Snrpn* (C/T) imprinting using *Mus musculus domesticus* (abbreviated, BL6) and *Mus musculus castaneus* (abbreviated, Cast) mice. (e) Sequence analysis of *Dlk1* expressed isoforms A (secreted isoform) and D (membrane bound isoform) from SVZ, NSCs, and niche astrocytes derived from BL6 and Cast hybrid mice. (f) Sequence analysis of RT-PCR products from SVZ, NSCs, and niche-astrocytes derived from reciprocal F1 hybrids from BL6 and Cast mice at different developmental stages. Three independent experiments with three samples of each were used for sequencing analysis. Scale bars: left and right panels in b, 40  $\mu$ m; central panel in b and c, 10  $\mu$ m.
