# Supplementary material
Source: PubMed Central journal article supplement (PMC3160481)
Supplement: NIHMS36010-supplement-7.pdf [file NIHMS36010-supplement-7.pdf]

## Supplementary Figure 7

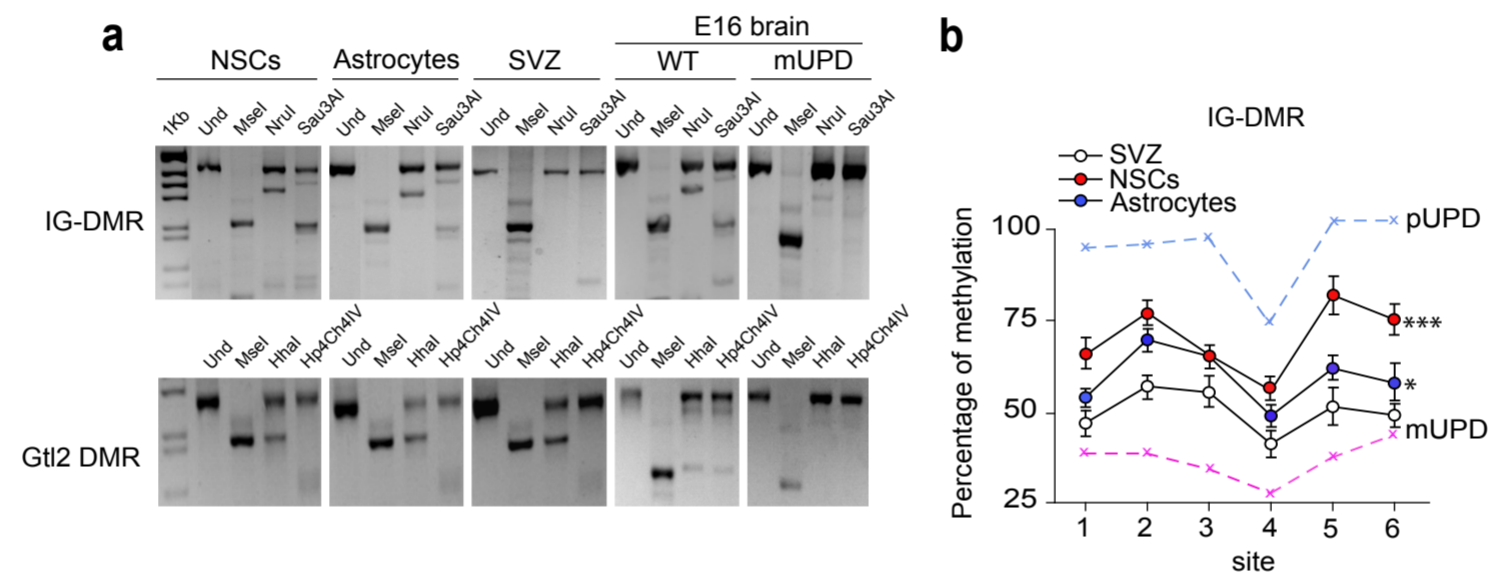

**Supplementary Figure 7. IG-DMR is hypermethylated in NSCs and niche-astrocytes.** (a) Overall methylation profiles of the IG-DMR and Gtl2 DMR analyzed by combined bisulfite restriction analysis (COBRA). Bisulfite-treated DNA amplified products were cleaved by restriction enzymes NruI, Sau3AI and MluI for the IG-DMR, HincII and HpyCH4IV for the Gtl2 DMR and HhaI and HpyCH4IV for the Gtl2 DMR. The enzymes only cut the fragments when the specific CpG site was methylated. (b) Percentage of IG-DMR methylation determined by pyrosequencing. Maternal and paternal uniparental disomies (mUPD and pUPD) for chromosome 12 were used as controls. \* $p < 0.05$ , \*\*\* $p < 0.001$ . Error bars, s.e.m of three independent experiments with three cultures per condition.
